# Supplementary material
Source: HighWire-hosted journal article supplement (http://www.cmaj.ca/highwire/filestream/58719/field_highwire_adjunct_files/3/insulin-yu-4-at.pdf)
Supplement: insulin-yu-4-at.pdf [file insulin-yu-4-at.pdf]

| Appendix 4: Prevention and treatment of less common adverse effects reported with insulin |                                                                                                                                                                                                                                                                                                                                                                                                                                                             |                           |                                                                                                                                                                                                                                                                                                                                                                                                                                                                                                                                                        |
|-------------------------------------------------------------------------------------------|-------------------------------------------------------------------------------------------------------------------------------------------------------------------------------------------------------------------------------------------------------------------------------------------------------------------------------------------------------------------------------------------------------------------------------------------------------------|---------------------------|--------------------------------------------------------------------------------------------------------------------------------------------------------------------------------------------------------------------------------------------------------------------------------------------------------------------------------------------------------------------------------------------------------------------------------------------------------------------------------------------------------------------------------------------------------|
| Adverse effect                                                                            | Description                                                                                                                                                                                                                                                                                                                                                                                                                                                 | Evidence level            | Prevention and treatment                                                                                                                                                                                                                                                                                                                                                                                                                                                                                                                               |
| Congestive heart failure (CHF) <sup>1</sup>                                               | <ul style="list-style-type: none"> <li>CHF rates were highest in regimens that included insulin and lowest in regimens including metformin</li> <li>Addition of insulin to preexisting diabetes regimens significantly increased the rates of CHF relative to the addition of sulfonylureas (odds ratio [OR] 2.33, <math>p &lt; 0.0001</math>) and metformin (OR 2.66, <math>p &lt; 0.0001</math>) even after adjustment for relevant covariates</li> </ul> | 27-mo observational study | Conventional medical management for CHF as needed                                                                                                                                                                                                                                                                                                                                                                                                                                                                                                      |
| Edema <sup>2,3</sup>                                                                      | <ul style="list-style-type: none"> <li>Varies from mild peripheral edema to frank anasarca</li> </ul>                                                                                                                                                                                                                                                                                                                                                       | Case reports              | Self-limiting, rarely requires treatment except for diuretic use with anasarca                                                                                                                                                                                                                                                                                                                                                                                                                                                                         |
| Lipodystrophy <sup>4,5</sup>                                                              | <ul style="list-style-type: none"> <li>Most common cutaneous effect of insulin</li> <li>Consists of subcutaneous fat at injection sites</li> <li>Occurs in 3.6% of patients with type 2 diabetes and 28.7% of patients with type 1 diabetes</li> <li>Risk factors include: young age, low body mass index, abdominal injection site, and failure to rotate injection sites</li> </ul>                                                                       | Case reports              | <p>Prevention:</p> <ul style="list-style-type: none"> <li>Regular rotation of injection sites.</li> </ul> <p>Treatment:</p> <ul style="list-style-type: none"> <li>Rotation of injection sites and switching to rapid-acting insulin analogues so potential regression of affected sites may occur</li> <li>Insulin pump therapy</li> <li>Syringe assisted liposuction</li> </ul>                                                                                                                                                                      |
| Other cutaneous reactions <sup>6</sup>                                                    | <p>Lipoatrophy:</p> <ul style="list-style-type: none"> <li>Associated with older less purified insulin</li> <li>Rare with modern insulins</li> <li>Risk factors include: young age, individuals with previous dermal reactions to insulin</li> </ul> <p>Skin abscesses, pigmentation, and keloid formation:</p> <ul style="list-style-type: none"> <li>Rare</li> </ul>                                                                                      | Case reports              | <p>Lipoatrophy:</p> <ul style="list-style-type: none"> <li>Prevention: regular rotation of injection sites</li> <li>Treatment: injection of a modern insulin into the edge of the area, co-administration of insulin with dexamethasone (4 mcg/unit) or switching to insulin pump therapy</li> </ul> <p>Skin abscesses:</p> <ul style="list-style-type: none"> <li>Prevention: good hygiene and appropriate antiseptic measures, rotation of injection site</li> </ul>                                                                                 |
| Allergic reactions and formation of antibodies to insulin <sup>7-12</sup>                 | <ul style="list-style-type: none"> <li>Associated with older less purified insulin</li> <li>Rare with modern insulins</li> </ul>                                                                                                                                                                                                                                                                                                                            | Case reports              | <p>Cutaneous allergic reactions:</p> <ul style="list-style-type: none"> <li>Tend to be short-lived and resolve spontaneously within a few weeks</li> <li>Antihistamines or corticosteroids if needed</li> <li>Switching insulin used (avoid use of insulins containing zinc or protamine)</li> <li>Dividing of dose and varying delivery sites</li> <li>Addition of 1 mcg dexamethasone to each unit of insulin per injection</li> <li>Use of insulin pump therapy</li> <li>Insulin withdrawal</li> <li>Densitization in more serious cases</li> </ul> |
| Other adverse effects                                                                     | <ul style="list-style-type: none"> <li>Insulin-induced transaminitis<sup>13</sup> (&gt; 10 times the upper limit of normal)</li> <li>Reversible nephrotic syndrome<sup>14</sup></li> <li>Beta-cell destruction<sup>15</sup> (complete disappearance of C-peptide upon insulin initiation)</li> </ul>                                                                                                                                                        | Case reports              | No specific prevention nor treatment strategy to avoid                                                                                                                                                                                                                                                                                                                                                                                                                                                                                                 |

## References

1. Nichols GA, Koro CE, Kolatkar NS. The incidence of heart failure among nondiabetic patients with and without impaired fasting glucose. *J Diabetes Complications* 2009;23(3):224-8.
2. Chelliah A, Burge MR. Insulin edema in the twenty-first century: review of the existing literature. *J Investig Med* 2004;52(2):104-8.
3. Hirshberg B, Muszkat M, Marom T, Shalit M. Natural course of insulin edema. *J Endocrinol Invest* 2000;23(3):187-8.
4. Hauner H, Stockamp B, Haastert B. Prevalence of lipohypertrophy in insulin-treated diabetic patients and predisposing factors. *Exp Clin Endocrinol Diabetes* 1996;104(2):106-10.
5. Richardson T, Kerr D. Skin-related complications of insulin therapy: epidemiology and emerging management strategies. *Am J Clin Dermatol* 2003;4(10):661-7.
6. Skelly AH, Van Son AR. Insulin allergy in clinical practice. *Nurse Pract* 1987;12(4):14-8, 23.
7. Di MU, Arduini P, Tiberti C, Lombardi G, Pietravalle P, Andreani D. Immunogenicity of biosynthetic human insulin. Humoral immune response in diabetic patients beginning insulin treatment and in patients previously treated with other insulins. *Diabetes Res Clin Pract* 1986;2(6):317-24.
8. Nagai Y, Mori T, Abe T, Nomura G. Immediate-Type allergy against human insulin associated with marked eosinophilia in type 2 diabetic patient. *Endocr J* 2001;48(3):311-6.
9. Bollinger ME, Butz A, Mudd K, Hamilton RG. Contamination of nebulizers with environmental allergens. *Ann Allergy Asthma Immunol* 2005;95(5):429-32.
10. Yamagishi S, Abe T, Sawada T. A case of newly diagnosed non-insulin-dependent diabetes associated with immediate-type allergy against human insulin. *Horm Res* 1995;43(6):300-2.
11. Moyes V, Driver R, Croom A, Mirakian R, Chowdhury TA. Insulin allergy in a patient with Type 2 diabetes successfully treated with continuous subcutaneous insulin infusion. *Diabet Med* 2006;23(2):204-6.
12. De L, I, Delvigne C, Bekaert J. Insulin allergy treated with human insulin (recombinant DNA). *Diabetes Care* 1982;5(Suppl 2):168-70.
13. Tawata M, Ikeda M, Kodama Y, Aida K, Onaya T. A type 2 diabetic patient with liver dysfunction due to human insulin. *Diabetes Res Clin Pract* 2000;49(1):17-21.
14. Dornan TL, Jenkins S, Cotton RE, Tattersall RB, Burden RP. The nephrotic syndrome at presentation of insulin-dependent diabetes mellitus; cause or coincidence? *Diabet Med* 1988;5(4):387-90.
15. Nakamura M, Nishida W, Yamada Y, Chujo D, Watanabe Y, Imagawa A, et al. Insulin administration may trigger pancreatic beta-cell destruction in patients with type 2 diabetes. *Diabetes Res Clin Pract* 2008;79(2):220-9.
